# Supplementary material for: Changes in Weight, Waist Circumference and Compensatory Responses with Different Doses of Exercise among Sedentary, Overweight Postmenopausal Women
Source: PLOS journal article supplement (doi:10.1371/journal.pone.0004515), 2009-02-17
Supplement: S1 (10.1371/journal.pone.0004515.s001) [file journal.pone.0004515.s001]

CONSORT Statement 2001 - Checklist   
 Items to include when reporting a randomized trial

| PAPER SECTION<br>And topic                 | Item | Descriptor                                                                                                                                                                                                                                                                                                                                                  | Reported on<br>Page #     |
|--------------------------------------------|------|-------------------------------------------------------------------------------------------------------------------------------------------------------------------------------------------------------------------------------------------------------------------------------------------------------------------------------------------------------------|---------------------------|
| TITLE & ABSTRACT                           | 1    | <u>How participants were allocated to interventions</u> (e.g., "random allocation", "randomized", or "randomly assigned").                                                                                                                                                                                                                                  | Abstract<br>Methods       |
| INTRODUCTION<br>Background                 | 2    | <u>Scientific background and explanation of rationale.</u>                                                                                                                                                                                                                                                                                                  | Introduction              |
| METHODS<br>Participants                    | 3    | <u>Eligibility criteria for participants</u> and the <u>settings and locations where the data were collected.</u>                                                                                                                                                                                                                                           | Methods                   |
| Interventions                              | 4    | <u>Precise details of the interventions intended for each group and how and when they were actually administered.</u>                                                                                                                                                                                                                                       | Methods                   |
| Objectives                                 | 5    | <u>Specific objectives and hypotheses.</u>                                                                                                                                                                                                                                                                                                                  | Introduction              |
| Outcomes                                   | 6    | <u>Clearly defined primary and secondary outcome measures</u> and, when applicable, any <u>methods used to enhance the quality of measurements</u> (e.g., multiple observations, training of assessors).                                                                                                                                                    | Methods                   |
| Sample size                                | 7    | <u>How sample size was determined</u> and, when applicable, <u>explanation of any interim analyses and stopping rules.</u>                                                                                                                                                                                                                                  | Method<br>Ref.            |
| Randomization --<br>Sequence generation    | 8    | <u>Method used to generate the random allocation sequence, including details of any restrictions</u> (e.g., blocking, stratification)                                                                                                                                                                                                                       | Methods<br>Ref.           |
| Randomization --<br>Allocation concealment | 9    | <u>Method used to implement the random allocation sequence</u> (e.g., numbered containers or central telephone), clarifying whether the sequence was concealed until interventions were assigned.                                                                                                                                                           | Methods<br>Ref; Church    |
| Randomization --<br>Implementation         | 10   | <u>Who generated the allocation sequence, who enrolled participants, and who assigned participants to their groups.</u>                                                                                                                                                                                                                                     | Ref; Church,<br>Morss     |
| Blinding (masking)                         | 11   | <u>Whether or not participants, those administering the interventions, and those assessing the outcomes were blinded to group assignment.</u> If done, <u>how the success of blinding was evaluated.</u>                                                                                                                                                    | Morss.<br>Methods<br>Ref. |
| Statistical methods                        | 12   | <u>Statistical methods used to compare groups for primary outcome(s); Methods for additional analyses</u> , such as subgroup analyses and adjusted analyses.                                                                                                                                                                                                | Methods<br>Statistics     |
| RESULTS<br>Participant flow                | 13   | <u>Flow of participants through each stage</u> (a diagram is strongly recommended). Specifically, for each group report the numbers of participants randomly assigned, receiving intended treatment, completing the study protocol, and analyzed for the primary outcome. <u>Describe protocol deviations from study as planned, together with reasons.</u> | Fig. 1                    |
| Recruitment                                | 14   | <u>Dates defining the periods of recruitment and follow-up.</u>                                                                                                                                                                                                                                                                                             | Ref; Church               |
| Baseline data                              | 15   | <u>Baseline demographic and clinical characteristics of each group.</u>                                                                                                                                                                                                                                                                                     | Table 1                   |
| Numbers analyzed                           | 16   | <u>Number of participants (denominator) in each group included in each analysis and whether the analysis was by "intention-to-treat".</u> State the results in absolute numbers when feasible (e.g., 10/20, not 50%).                                                                                                                                       | Fig. 1<br>Results         |
| Outcomes and estimation                    | 17   | <u>For each primary and secondary outcome, a summary of results for each group, and the estimated effect size and its precision</u> (e.g., 95% confidence interval).                                                                                                                                                                                        | Results                   |
| Ancillary analyses                         | 18   | <u>Address multiplicity by reporting any other analyses performed</u> , including subgroup analyses and adjusted analyses, indicating those pre-specified and those exploratory.                                                                                                                                                                            | n/a                       |
| Adverse events                             | 19   | <u>All important adverse events or side effects in each intervention group.</u>                                                                                                                                                                                                                                                                             | Ref; Church               |
| DISCUSSION<br>Interpretation               | 20   | <u>Interpretation of the results</u> , taking into account study hypotheses, sources of potential bias or imprecision and the dangers associated with multiplicity of analyses and outcomes.                                                                                                                                                                | Discussion                |
| Generalizability                           | 21   | <u>Generalizability (external validity) of the trial findings.</u>                                                                                                                                                                                                                                                                                          | Discussion                |
| Overall evidence                           | 22   | <u>General interpretation of the results in the context of current evidence.</u>                                                                                                                                                                                                                                                                            | Discussion                |
